# Supplementary material for: Single-center experience with laparoscopic diaphragmatic plication for diaphragmatic eventration
Source: Research Square preprint supplement (doi:10.21203/rs.3.rs-5893619/v1), 2025-01-28
Supplement: Supplementary file 1 [file 4a11cdd1a4bd8a0441224832.docx]

Table 1: Patients information and secondary outcomes for laparoscopic diaphragmatic plication.

| No. | Age | Gender | BMI(kg/m2) | Side | Symptoms | Operative time (minutes) | Blood loss (ml) | Post-operation hospital stay (day) |
| --- | --- | --- | --- | --- | --- | --- | --- | --- |
| 1 | 63 | M | 21.48 | L | Dyspnea | 245 | 20 | 7 |
| 2 | 58 | F | 23.88 | L | Dyspnea | 110 | 5 | 3 |
| 3 | 64 | F | 22.14 | L | Dyspnea | 110 | 20 | 5 |
| 4 | 68 | M | 19.57 | L | Dyspnea | 110 | 20 | 3 |
| 5 | 62 | M | 24.98 | L | Dyspnea | 110 | 5 | 20 |
| 6 | 64 | F | 21.57 | L | Epigastric pain | 110 | 20 | 2 |
| 7 | 76 | F | 26.02 | L | Dyspnea | 90 | 10 | 26 |
| 8 | 57 | M | 26.98 | L | Dyspnea | 85 | 10 | 6 |
| 9 | 75 | M | 23.14 | L | Epigastric pain | 90 | 10 | 12 |
| 10 | 65 | F | 22.15 | L | Dyspnea | 95 | 20 | 6 |
| 11 | 59 | M | 25.31 | L | Dyspnea | 80 | 10 | 3 |
| 12 | 83 | M | 27.85 | L | Dyspnea | 80 | 10 | 10 |
| 13 | 76 | M | 23.14 | L | Dyspnea | 95 | 5 | 5 |
| 14 | 55 | M | 22.14 | L | Dyspnea | 100 | 5 | 7 |
| 15 | 62 | M | 20.70 | L | Dyspnea | 75 | 3 | 2 |
