# Supplementary material for: Single-center experience with laparoscopic diaphragmatic plication for diaphragmatic eventration
Source: Research Square preprint supplement (doi:10.21203/rs.3.rs-5893619/v1), 2025-01-28
Supplement: Supplementary file 2 [file de72c499956598bfb691e641.docx]

Table 2: Primary outcomes for patients underwent laparoscopic diaphragmatic plication.

| No. | Post-operative complications | Pleural effusion | Descending distance (IS) | Improvement of symptoms | Pre-op FVC% | Post-op FVC% | Pre-op FEV1% | Post-op FEV1 | Follow-up (month) | Recurrence |
| --- | --- | --- | --- | --- | --- | --- | --- | --- | --- | --- |
| 1 | Chest pain, abdominal distension |  | 2 | Yes | 74% | 100% | 73% | 84% | 68 | Yes |
| 2 | Abdominal distension |  | 2 | Yes |  |  |  |  | 68 | No |
| 3 | Epigastric pain | 1.9cm | 1 | Yes |  |  |  |  | 67 | No |
| 4 | Epigastric pain |  | 3 | Yes |  |  |  |  | 56 | No |
| 5 | Cardiac tamponade | 3.56cm | 3 | Yes |  |  |  |  | 48 | No |
| 6 | Epigastric pain |  | 2 | No |  |  |  |  | 42 | No |
| 7 | Dyspnea | 5.8cm (Punctured) | 2 | Yes |  |  |  |  | 38 | No |
| 8 | Chest pain, Dyspnea | 6.1cm (Punctured) | 3 | Yes |  |  |  |  | 34 | No |
| 9 | Pneumonia | 3.69cm | 1 | Yes | 75.7% | 57% | 67.6% | 59% | 26 | No |
| 10 | Dyspnea | 6.58 (Punctured) | 1 | Yes |  |  |  |  | 23 | No |
| 11 |  |  | 1 | Yes | 68.9% | 77% | 64.4% | 74% | 14 | No |
| 12 | Dyspnea | 4.71 (Punctured) | 1 | Yes |  |  |  |  | 14 | No |
| 13 | Pneumonia |  | 1 | Yes |  |  |  |  | 9 | No |
| 14 | Dyspnea |  | 2 | No | 51.8% | 67.6% | 38.5% | 48.7% | 9 | No |
| 15 |  |  | 1 | Yes | 81.4% | 86.3% | 72.1% | 76.9% | 8 | No |

IS: intercostal spaces, FVC%: percent predicted Forced Vital Capacity, FEV1%: percent predicted Forced Expiratory Volume in 1 Second.
